# Supplementary material for: Differences in Cumulative Long-Term Care Costs by Community Activities and Employment: A Prospective Follow-Up Study of Older Japanese Adults
Source: MDPI journal article supplement (doi:10.3390/ijerph18105414), 2021-05-19
Supplement: s1 [file s1]

**Table S3.** C-statistics using a multinomial regression model <sup>1</sup>

|                                                        | A few times<br>a year | Once or twice<br>a month | Once<br>a week | Twice<br>a week + |
|--------------------------------------------------------|-----------------------|--------------------------|----------------|-------------------|
| Hobby activities group (ref. never)                    | 0.643                 | 0.657                    | 0.682          | 0.659             |
| Sports group or club (ref. never)                      | 0.714                 | 0.706                    | 0.682          | 0.651             |
| Volunteer group (ref. never)                           | 0.666                 | 0.631                    | 0.658          | 0.656             |
| Employed                                               |                       |                          |                |                   |
| Employment status<br>(ref. retired / never had a job ) | 0.709                 |                          |                |                   |

1. C statistics by multinominal regression model in order to calculate generalized propensity scores were not high: hobby activities group=.643 to .682, sports group or club=.651 to .714, volunteer group=.631 to 666, employment=.709. However, it is not necessarily to mean undesirable model, because the goal of a propensity score model is to efficiently control confounding, not to predict treatment or exposure.
