# Supplementary material for: Differences in Cumulative Long-Term Care Costs by Community Activities and Employment: A Prospective Follow-Up Study of Older Japanese Adults
Source: MDPI journal article supplement (doi:10.3390/ijerph18105414), 2021-05-19
Supplement: s1 [file s1]

**Table S2.** Covariate balance summary: standardized differences

|                              | Hobby activities group (ref. never)                 |          |             |          |                       |          |                    |          |
|------------------------------|-----------------------------------------------------|----------|-------------|----------|-----------------------|----------|--------------------|----------|
|                              | Twice a week +                                      |          | Once a week |          | Once or twice a month |          | A few times a year |          |
|                              | Raw                                                 | Weighted | Raw         | Weighted | Raw                   | Weighted | Raw                | Weighted |
| Sex                          | -0.162                                              | 0.027    | -0.328      | -0.013   | -0.140                | -0.004   | 0.263              | 0.001    |
| Age                          | -0.161                                              | -0.005   | -0.153      | 0.006    | -0.156                | -0.013   | -0.171             | -0.002   |
| Years of education           | 0.220                                               | -0.015   | 0.322       | 0.007    | 0.337                 | 0.008    | 0.256              | 0.012    |
| Equivalent income            | 0.111                                               | -0.009   | 0.197       | -0.002   | 0.198                 | 0.009    | 0.136              | -0.007   |
| Marital status               | -0.073                                              | -0.005   | -0.014      | -0.007   | -0.063                | -0.005   | -0.105             | 0.016    |
| Living situation             | 0.073                                               | -0.004   | 0.063       | 0.000    | 0.044                 | -0.007   | -0.026             | 0.016    |
| Disease and/or impairment    | 0.062                                               | -0.019   | 0.028       | 0.012    | 0.031                 | 0.010    | 0.036              | -0.006   |
| Recognition of forgetfulness | -0.152                                              | 0.001    | -0.115      | 0.013    | -0.136                | -0.005   | -0.117             | -0.010   |
| Self-rated health            | -0.392                                              | 0.018    | -0.319      | -0.021   | -0.301                | -0.006   | -0.212             | -0.005   |
| Municipality                 | -0.037                                              | 0.008    | -0.060      | -0.009   | -0.036                | -0.011   | -0.102             | 0.007    |
|                              | Sports group or club (ref. never)                   |          |             |          |                       |          |                    |          |
|                              | Twice a week +                                      |          | Once a week |          | Once or twice a month |          | A few times a year |          |
|                              | Raw                                                 | Weighted | Raw         | Weighted | Raw                   | Weighted | Raw                | Weighted |
| Sex                          | -0.068                                              | 0.024    | -0.268      | 0.017    | 0.307                 | -0.001   | 0.476              | -0.012   |
| Age                          | -0.187                                              | -0.003   | -0.251      | -0.003   | -0.226                | -0.012   | -0.210             | -0.006   |
| Years of education           | 0.208                                               | -0.009   | 0.311       | 0.012    | 0.388                 | 0.026    | 0.274              | -0.031   |
| Equivalent income            | 0.086                                               | -0.002   | 0.213       | 0.012    | 0.279                 | -0.016   | 0.139              | -0.054   |
| Marital status               | -0.131                                              | -0.015   | -0.059      | -0.012   | -0.230                | -0.015   | -0.230             | 0.041    |
| Living situation             | 0.005                                               | -0.002   | 0.025       | -0.015   | -0.073                | 0.026    | -0.137             | 0.029    |
| Disease and/or impairment    | 0.048                                               | 0.003    | 0.067       | -0.002   | 0.058                 | -0.011   | 0.097              | 0.001    |
| Recognition of forgetfulness | -0.147                                              | -0.002   | -0.102      | -0.009   | -0.104                | 0.001    | -0.108             | -0.006   |
| Self-rated health            | -0.390                                              | 0.003    | -0.353      | -0.012   | -0.354                | 0.001    | -0.257             | -0.006   |
| Municipality                 | -0.100                                              | 0.019    | -0.075      | -0.034   | -0.166                | -0.008   | -0.110             | 0.002    |
|                              | Volunteer group (ref. never)                        |          |             |          |                       |          |                    |          |
|                              | Twice a week +                                      |          | Once a week |          | Once or twice a month |          | A few times a year |          |
|                              | Raw                                                 | Weighted | Raw         | Weighted | Raw                   | Weighted | Raw                | Weighted |
| Sex                          | 0.084                                               | 0.056    | 0.026       | 0.053    | -0.085                | 0.006    | 0.113              | 0.015    |
| Age                          | -0.195                                              | -0.053   | -0.284      | -0.032   | -0.235                | -0.014   | -0.190             | -0.037   |
| Years of education           | 0.306                                               | 0.000    | 0.369       | -0.004   | 0.208                 | 0.018    | 0.113              | 0.008    |
| Equivalent income            | 0.035                                               | 0.011    | 0.122       | 0.002    | 0.123                 | 0.009    | 0.067              | 0.006    |
| Marital status               | -0.089                                              | -0.017   | -0.120      | -0.006   | -0.109                | -0.022   | -0.188             | -0.021   |
| Living situation             | 0.007                                               | -0.017   | 0.000       | 0.016    | -0.046                | 0.012    | -0.091             | -0.009   |
| Disease and/or impairment    | 0.149                                               | 0.007    | 0.170       | -0.002   | 0.051                 | -0.002   | 0.085              | 0.007    |
| Recognition of forgetfulness | -0.131                                              | 0.006    | -0.096      | -0.035   | -0.138                | -0.002   | -0.150             | -0.009   |
| Self-rated health            | -0.367                                              | 0.014    | -0.322      | -0.012   | -0.262                | -0.027   | -0.232             | -0.029   |
| Municipality                 | 0.054                                               | -0.008   | -0.016      | 0.022    | -0.005                | -0.003   | 0.028              | -0.041   |
|                              | Employment status (ref. retired / never had a job ) |          |             |          |                       |          |                    |          |
|                              | Employed                                            |          |             |          |                       |          |                    |          |
|                              | Raw                                                 | Weighted |             |          |                       |          |                    |          |
| Sex                          | 0.286                                               | -0.015   |             |          |                       |          |                    |          |
| Age                          | -0.500                                              | 0.036    |             |          |                       |          |                    |          |
| Years of education           | 0.032                                               | -0.003   |             |          |                       |          |                    |          |
| Equivalent income            | 0.299                                               | -0.033   |             |          |                       |          |                    |          |
| Marital status               | -0.106                                              | 0.031    |             |          |                       |          |                    |          |
| Living situation             | -0.087                                              | 0.016    |             |          |                       |          |                    |          |
| Disease and/or impairment    | 0.244                                               | -0.003   |             |          |                       |          |                    |          |
| Recognition of forgetfulness | -0.048                                              | 0.002    |             |          |                       |          |                    |          |
| Self-rated health            | -0.260                                              | -0.009   |             |          |                       |          |                    |          |
| Municipality                 | -0.002                                              | 0.003    |             |          |                       |          |                    |          |
