# Supplementary material for: Differences in Cumulative Long-Term Care Costs by Community Activities and Employment: A Prospective Follow-Up Study of Older Japanese Adults
Source: MDPI journal article supplement (doi:10.3390/ijerph18105414), 2021-05-19
Supplement: s1 [file s1]

**Table S1.** Characteristics of the survey respondents at baseline <sup>1</sup>

|                              | Total          |      | Cumulative cost<br>of LTC services<br>in 6 years |
|------------------------------|----------------|------|--------------------------------------------------|
|                              | n <sup>2</sup> | %    | (thousand USD) <sup>3</sup><br>Mean ± SD         |
| Sex                          |                |      |                                                  |
| Female                       | 25031          | 53.7 | 4.31 ± 16.83                                     |
| Male                         | 21585          | 46.3 | 2.76 ± 12.56                                     |
| Age                          |                |      |                                                  |
| 65-74                        | 27000          | 57.9 | 1.11 ± 8.31                                      |
| 75-84                        | 16675          | 35.8 | 5.47 ± 18.09                                     |
| 85+                          | 2941           | 6.3  | 15.69 ± 29.41                                    |
| Years of education           |                |      |                                                  |
| 6-9                          | 22235          | 49.1 | 4.20 ± 16.38                                     |
| 10-12                        | 15182          | 33.5 | 2.84 ± 13.01                                     |
| 13+                          | 7889           | 17.4 | 2.45 ± 12.12                                     |
| Equivalent income (1000USD)  |                |      |                                                  |
| - 19.9                       | 13236          | 41.6 | 3.16 ± 14.13                                     |
| 20.0 - 29.9                  | 8886           | 27.9 | 3.06 ± 13.95                                     |
| 30.0 - 39.9                  | 5576           | 17.5 | 2.37 ± 12.03                                     |
| 40.0+                        | 4117           | 12.9 | 2.38 ± 11.69                                     |
| Marital status               |                |      |                                                  |
| Married                      | 32764          | 72.1 | 2.51 ± 12.29                                     |
| Widowed                      | 10087          | 22.2 | 6.83 ± 20.85                                     |
| Divorced                     | 1605           | 3.5  | 2.49 ± 11.31                                     |
| Never married                | 992            | 2.2  | 5.00 ± 18.68                                     |
| Living situation             |                |      |                                                  |
| Living alone                 | 6163           | 13.5 | 5.36 ± 18.63                                     |
| Living with others           | 39644          | 86.5 | 3.25 ± 14.18                                     |
| Disease and/or impairment    |                |      |                                                  |
| None                         | 10360          | 24.9 | 2.44 ± 12.84                                     |
| Presence                     | 31294          | 75.1 | 3.79 ± 15.43                                     |
| Recognition of forgetfulness |                |      |                                                  |
| None                         | 36058          | 82.4 | 2.86 ± 13.30                                     |
| Presence                     | 7720           | 17.6 | 6.54 ± 20.31                                     |
| Self-rated health            |                |      |                                                  |
| Excellent                    | 5333           | 11.7 | 1.65 ± 10.03                                     |
| Good                         | 30926          | 67.9 | 2.91 ± 13.25                                     |
| Fair                         | 7848           | 17.2 | 6.23 ± 19.76                                     |
| Poor                         | 1426           | 3.1  | 9.12 ± 25.19                                     |

1. This dataset was composed twelve municipalities. Composition ratio of respondents was as follows: A town=2.5%, B town=2.7%, C town=4.4%, D city=6.4%, E city=7.1%, F city=29.7%, G city=7.7%, H city=13.9%, I town=5.8%, J town=9.0%, K town=3.0%, L city=7.7%

2. The observations that had missing values were removed.

3. 1USD≈100JPY
