# Supplementary material for: Differences in Cumulative Long-Term Care Costs by Community Activities and Employment: A Prospective Follow-Up Study of Older Japanese Adults
Source: Int J Environ Res Public Health. 2021 May 19;18(10):5414. doi: 10.3390/ijerph18105414 (PMC8158700; doi:10.3390/ijerph18105414)
Supplement: Supplementary file 1 [file ijerph-18-05414-s001.zip]

Archive with 4 entries (4 files):
- 9_Supplementary Material 1r.pdf
- 9_Supplementary Material 2.pdf
- 9_Supplementary Material 3.pdf
- 9_Supplementary Material 4.pdf
